# Supplementary material
Source: publisher site journal article supplement (https://www.dovepress.com/article/557802)
Supplement: Supplementary file 1 [file 557802%20Supplemental%20table%201.docx]

Supplemental table 1: Baseline characteristics of the overall study cohort by gender

| Characteristics | Male (n=108) | Female (n=113) | *p*-value |
| --- | --- | --- | --- |
| Median age, years (Q1, Q3) | 58 (40, 64) | 53 (43, 62) | 0.606 |
| Posaconazole level <0.7 mcg/mL, n (%) | 34 (31.5) | 21 (18.6) | 0.027 |
| Median weight, kg (Q1, Q3) | 69.0 (61.4, 74.8) | 55.5 (50.4, 63.0) | <0.001 |
| Median BMI, kg/m2 (Q1, Q3) | 23.6 (21.7, 25.7) | 22.6 (20.5, 24.9) | 0.0049 |
| ALT ≥120 U/L, n (%)a | 5 (4.6) | 4 (3.5) | 0.744 |
| T-Bil ≥1.2 mg/dL, n (%)b | 29 (26.9) | 14 (12.4) | 0.007 |
| Median eGFR, mL/min/1.73 m2 (Q1, Q3)c | 118.8 (93.5, 144.6) | 120.9 (100.1, 145.2) | 0.371 |
| Albumin <3.5 g/dL, n (%)d | 50 (46.3) | 49 (43.4) | 0.661 |
| CRP >4 mg/dL, n (%)e | 50 (46.3) | 44 (38.9) | 0.269 |
| With loading dose, n (%) | 34 (31.5) | 43 (38.1) | 0.305 |
| Intravenous posaconazole use, n (%) | 3 (2.8) | 8 (7.1) | 0.142 |
| Poor intake, n (%) | 27 (25.0) | 36 (31.9) | 0.259 |
| Diarrhea, n (%) | 24 (22.2) | 28 (24.8) | 0.654 |
| Proton pump inhibitors use, n (%) | 47 (43.5) | 66 (58.4) | 0.027 |
| H2-receptor antagonists use, n (%) | 25 (23.2) | 26 (23.0) | 0.980 |
| Prokinetics use, n (%) | 20 (18.5) | 27 (23.9) | 0.329 |
| With metabolic inducer, n (%)f | 12 (11.1) | 20 (17.7) | 0.164 |
| With metabolic inhibitor, n (%)g | 1 (0.9) | 0 (0) | 0.489 |

Abbreviations: ALT, alanine aminotransferase; BMI, body mass index; CRP, C-reactive protein; eGFR, estimated glomerular filtration rate; Q1, first quartile; Q3, third quartile; T-Bil, total bilirubin.

aThere were 221 patients with ALT data before therapeutic drug monitoring (TDM).

bThere were 220 patients with T-Bil data before TDM.

cThere were 221 patients with eGFR data before TDM.

dThere were 187 patients with albumin data before TDM.

eThere were 192 patients with CRP data before TDM.

fPosaconazole metabolism inducer included lorazepam and rifampin.

gPosaconazole metabolism inhibitor included cobicistat.
